# Supplementary material
Source: PubMed Central journal article supplement (PMC3413854)
Supplement: bph0165-2167-SD1.pdf [file bph0165-2167-SD1.pdf]

**A**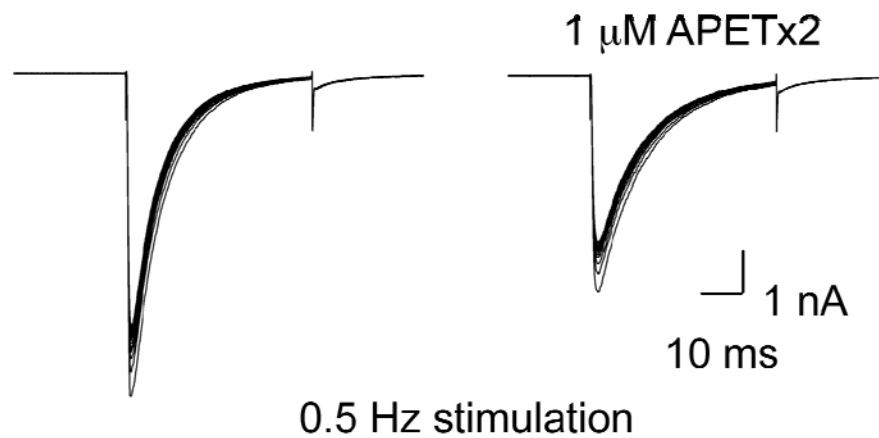**B**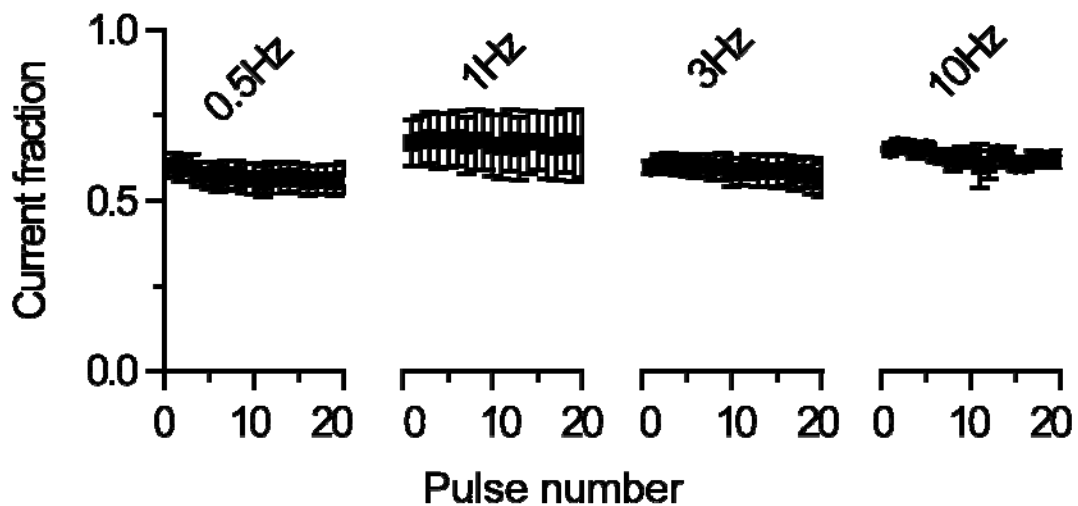

**Supplemental Figure S1. APETx2 inhibition of Nav1.8 current is not use-dependent.** Currents were recorded from acutely dissociated DRG neurons, with all bath solutions containing TTX. A series of 20 50-ms depolarizations from -70 mV to +20 mV were performed at the frequencies indicated (0.5-10Hz). **A.** A typical experiment at 0.5 Hz is shown. **B.** Current inactivation was corrected by dividing the currents obtained with 1  $\mu\text{M}$  APETx2 to that obtained without APETx2 at each pulse. This ratio is plotted as a function of the pulse number (1-20) for each stimulation frequency,  $n=4$  for each condition.
